# Supplementary material
Source: ML conference proceedings conference paper supplement (https://openreview.net/forum?id=vcNjibzV3P)
Supplement: supplementary_material [file attachment]

## 506 Appendix

### 507 A Proofs

508 We begin by stating and proving a result mentioned in the main text: once we construct an invariant  
 509 separator, we can obtain a universal model by composing the separation with a standard fully  
 510 connected neural network:

511 **Theorem A.1** (Separation Implies Universality). *Let  $f : \mathbb{R}^{d \times n} \rightarrow \mathbb{R}$  be a  $G$ -invariant continuous*  
 512 *function. If  $F : \mathbb{R}^{d \times n} \rightarrow \mathbb{R}^M$  is an invariant separator, then for any compact set  $K \subset \mathbb{R}^{d \times n}$ , and*  
 513 *any  $\epsilon > 0$ , there exists a neural network  $\mathcal{N}^\epsilon : \mathbb{R}^M \rightarrow \mathbb{R}$  such that  $\sup_{x \in K} |f(x) - \mathcal{N}^\epsilon \circ F(x)| < \epsilon$ .*

*Proof.* Let  $\epsilon > 0$  and  $K \subseteq \mathbb{R}^{d \times n}$  be a compact set. Using Proposition 1.3 in Dym and Gortler [2023],  
 there exists a continuous  $f^\epsilon$  such that

$$|f(x) - f^\epsilon \circ F(x)| < \frac{\epsilon}{2}$$

The image of a compact set under a continuous function is a compact set, see Munkres [2000],  
 then  $S := \text{Im}(F)$  is compact. By the Universal Approximation Theorem Cybenko [1989], we can  
 approximate  $f^\epsilon$  with a fully-connected Neural Network with arbitrary precision, i.e. there exists a  
 Neural Network Function  $\mathcal{N}^\epsilon$  such that for all  $x \in S$ ,

$$|f^\epsilon(x) - \mathcal{N}^\epsilon(x)| < \frac{\epsilon}{2}$$

By the Triangle Inequality, for all  $x \in K$ ,

$$|f(x) - \mathcal{N}^\epsilon \circ F(x)| \leq |f(x) - f^\epsilon \circ F(x)| + |f^\epsilon \circ F(x) - \mathcal{N}^\epsilon \circ F(x)| < \frac{\epsilon}{2} + \frac{\epsilon}{2} = \epsilon$$

514 □

515 **Theorem 2.1.** *Two iterations of the 1-EWL test assign two point clouds  $\mathcal{X}, Y \in \mathbb{R}_{distinct}^{3 \times n}$  the same*  
 516 *value, if and only if  $X \stackrel{\mathcal{O}[3, n]}{=} Y$ .*

517 *Proof.* Assume we initialize the hidden states with null information. After a single iteration, we have

$$h_i^{(1)} = \{\|x_i - x_j\| \mid j \neq i\} = d(i, X) \quad (8)$$

518 By assumption, all  $h_i^{(1)}$ ,  $i = 1, \dots, n$ , are distinct. Thus at the next iteration,

$$h_i^{(2)} = \left( h_i^{(1)}, \{\|h_j^{(1)} - h_i^{(1)}\| \mid j \neq i\} \right) \quad (9)$$

$$\{\{h_i^{(2)} \mid i \in [n]\}\} \quad (10)$$

519 we know each node's *ordered* distances from the other nodes, as the  $i$ -th node is uniquely (intra-  
 520 point-cloud) determined by  $h_i^{(1)}$ . Thus we can recover the distance matrix

$$\begin{pmatrix} h_1^{(1)} & h_2^{(1)} & \cdot & \cdot & h_n^{(1)} \\ \|x_1 - x_1\| & \|x_2 - x_1\| & \cdot & \cdot & \|x_n - x_1\| \\ \|x_1 - x_2\| & 0 & \cdot & \cdot & \cdot \\ \cdot & \cdot & 0 & \cdot & \cdot \\ \cdot & \cdot & \cdot & 0 & \cdot \\ \|x_1 - x_n\| & \|x_2 - x_n\| & \cdot & \cdot & \|x_n - x_n\| \end{pmatrix} \begin{pmatrix} h_1^{(1)} \\ h_2^{(1)} \\ \cdot \\ \cdot \\ h_n^{(1)} \end{pmatrix}$$

521 Thus, we can fully recover the point cloud up to Euclidean motion, see Victor Garcia Satorras [2021].  
 522 In conclusion, if  $X, Y \in \mathbb{R}^{d \times n}$  are assigned the same value by 1-EWL, then they are identical up to  
 523 permutation and Euclidean motion, i.e. an  $\mathcal{O}[3, n]$  transformation. □

By Theorem 2.1, 1-EWL is complete on  $\mathbb{R}^{3 \times n}_{distinct}$ . We now show that 1-EWL is incomplete at most on a (non-trivial) measure-zero set, thus by definition, it is complete almost everywhere on the space of point clouds endowed with permutation, rotation, and reflection symmetries.

**Theorem A.2** (1-EWL Separates Almost All Complete Euclidean Graphs). *Let  $\mu$  be the Lebesgue measure on  $\mathbb{R}^{3 \times n}$  where  $n \geq 3$ . Then,  $\mu(\mathbb{R}^{3 \times n} \setminus \mathbb{R}^{3 \times n}_{distinct}) = 0$ .*

*Proof.* We defined  $\mathbb{R}^{3 \times n}_{distinct} = \{X \in \mathbb{R}^{3 \times n} \mid d(i, X) \neq d(j, X) \ \forall i \neq j\}$ .

Then

$$\begin{aligned} \mathbb{R}^{3 \times n} \setminus \mathbb{R}^{3 \times n}_{distinct} &= \{X \in \mathbb{R}^{3 \times n} \mid \exists i \neq j \in [n] \text{ s.t. } d(j, X) = d(i, X)\} \\ &= \{X \in \mathbb{R}^{3 \times n} \mid \exists i \neq j \in [n] \text{ s.t. } \|\psi_{pow}(d(j, X)) - \psi_{pow}(d(i, X))\|^2 = 0\} \end{aligned} \quad (11)$$

where  $\psi_{pow}$  is the power-sum polynomials defined as  $\psi_{pow}(\vec{x}) = (\sum_{i=1}^n x_i, \dots, \sum_{i=1}^n x_i^n)$ , which is known to be injective on multisets with  $n$  elements.

Equation 11 defines an algebraic manifold with a non-trivial polynomial equality constraint, thus is of dimension  $\leq 3n - 1$ . If an algebraic manifold embedded in  $\mathbb{R}^{3 \times n}$  has dimension  $\leq 3n - 1$ , then it has measure zero Basu et al. [2006a].

□

**Theorem 3.2.** *For every  $X, Y \in \mathbb{R}^{3 \times n}$ , a single iteration of the 2-SEWL test assigns  $X$  and  $Y$  the same value if and only if  $X \stackrel{SO[3, n]}{=} Y$ .*

*Proof.* Let  $X, Y \in \mathbb{R}^{3 \times n}$ . Recall that a single iteration of the 2-SEWL assigns to each index pair  $i, j$  an initial coloring  $C_{(0)}[i, j] = C_{(0)}[i, j](X)$  corresponding to the  $2 \times 2$  Gram matrix of the points  $x_i, x_j$ . The coloring is then refined via

$$C_{(1)}(i, j) = \text{Embed}^{(0)}(C_{(0)}(i, j), \{\{C_{(0)}(k, j), C_{(0)}(i, k), \langle x_i \times x_j, x_k \rangle\}_{k=1}^n\}).$$

and then a final global coloring is obtained from

$$C_G = \text{Embed}^{(1)}(\{C_{(1)}(i, j) \mid (i, j) \in [n]^2\})$$

Let us denote the global feature  $C_G$  obtained from  $X$  by  $C_G(X)$ , and the global feature obtained from  $Y$  by  $C_G(Y)$ .

By construction, if  $X \stackrel{SO[3, n]}{=} Y$  then  $C_G(X) = C_G(Y)$ . We need to prove that if  $C_G(X) = C_G(Y)$  then  $X \stackrel{O[3, n]}{=} Y$ .

To make the proof more readable, we introduce the following notation (we will later describe its significance):

$$X_{[i, j]} = [x_i, x_j, x_i \times x_j] \in \mathbb{R}^{3 \times 3} \quad (12)$$

$$P_{[i, j, k]} = X_{[i, j]}^T x_k \quad (13)$$

$$G_{[i, j]}(X) = X_{[i, j]}^T X_{[i, j]} \quad (14)$$

$$h_{[i, j]}(X) = \text{Embed}_\alpha \{\{P_{[i, j, k]} \mid k \in [n], k \neq i, j\}\} \quad (15)$$

$$m_{[i, j]}(X) = (G_{[i, j]}(X), h_{[i, j]}(X)) \quad (16)$$

We now show that the multiset  $C_G(X) = \{\{C_{(1)}(i, j) \mid i, j \in [n]\}\}$  allows recovering the multiset  $h_X := \{m_{[i, j]} \mid i, j \in [n], i, j \in [n]\}$ .

It is enough to show that we can recover  $m_{[i, j]}$  from its corresponding  $C_{(1)}[i, j]$  for every  $i, j \in [n]$  and then the multiset equivalence follows immediately. Note that  $G_{[i, j]}$  is the  $3 \times 3$  Gram matrix of the vectors  $x_i, x_j, x_i \times x_j$ . It can be recovered from  $C_{(0)}(i, j)$ , which is the  $2 \times 2$  Gram matrix of  $x_i, x_j$ , because  $\langle x_i \times x_j, x_k \rangle = \langle x_i \times x_j, x_i \rangle = 0$  and

$$\|x_i \times x_j\| = \|x_i\| \|x_j\| \sin \theta = \|x_i\| \|x_j\| \sqrt{1 - \cos^2 \theta} = \|x_i\| \|x_j\| \sqrt{1 - \left(\frac{\langle x_i, x_j \rangle}{\|x_i\| \|x_j\|}\right)^2},$$

where  $\theta$  is the angle between  $x_i$  and  $x_j$ . The quantity on the RHS of the equation can be extracted from  $\mathbf{C}_{(0)}(\mathbf{i}, \mathbf{j})$ .

As for  $h_{i,j}$ , we can recover it as a multiset since:

$$P_{[i,j,k]} = (\langle x_i, x_k \rangle, \langle x_j, x_k \rangle, \langle x_i \times x_j, x_k \rangle) = (\mathbf{C}_{(0)}(i, k)[1, 2], \mathbf{C}_{(0)}(k, j)[1, 2], \langle x_i \times x_j, x_k \rangle) \quad (17)$$

We saw that  $h_X = \mathbf{Embed}\{\{m_{[i,j]}(X)|i, j \in [n]\}\}$  can be recovered from  $\mathbf{C}_G(X)$  and thus in particular our assumption that  $\mathbf{C}_G(X) = \mathbf{C}_G(Y)$  implies that  $h_X = h_Y$ . We will now use this to show that  $X \underset{\mathcal{SO}[3,n]}{=} Y$ .

We first deal with the degenerate case where all points in  $X$  are identical, that is  $x_1 = x_2 = \dots = x_n$ . In this case, all Gram matrices  $G_{i,j}(X)$ , and all entries in each of the matrices, will be identical, and thus by assumption also all Gram matrices  $G_{i,j}(Y)$ , and all their entries will be identical. This implies that  $Y$  also consists of a single point with the same norm as the one point in  $X$ , and therefore  $X \underset{\mathcal{SO}[3,n]}{=} Y$ .

We can now assume that not all points in  $X$  are the same. Define  $r(X) = \text{rank}(X) = \max_{i,j \in [n]} \text{rank}(G_{[i,j]}(X))$  (note that we assume that  $n \geq 3$ ). By assumption we have  $\{\{G_{[i,j]}(X)|i, j \in [n]\}\} = \{\{G_{[i,j]}(Y)|i, j \in [n]\}\}$ , thus  $r(X) = r(Y)$  and there exist  $i \neq j$  and  $s, t \in [n]$  such that  $G_{[i,j]}(X) = G_{[s,t]}(Y)$ ,  $(\star)$  they both have rank  $r$ , and  $x_i \neq x_j$ . Due to  $(\star)$  it follows that  $y_s \neq y_t$  and in particular  $s \neq t$ .

By Kraft and Procesi [1996], the equality of Gram matrices implies that there exists an orthogonal transformation,  $T \in \mathcal{O}(3)$ , such that

$$T(x_i) = y_s, T(x_j) = y_t, T(x_i \times x_j) = y_s \times y_t. \quad (18)$$

If  $x_i \times x_s \neq 0$  we see that  $T$  preserves orientation and therefore  $T \in \mathcal{SO}(3)$  (see Remark A.3). If not, and if  $T$  is a reflection, we can modify  $T$  to be a rotation which still satisfies (18) by composing it with a reflection that fixes the  $\leq 1$  dimensional subspace spanned by  $x_i, x_j$ . Thus in any case we can assume that  $T \in \mathcal{SO}(3)$ . By assumption and  $(\star)$ , we have  $\{\{P_{[i,j,k]}(X)|k \neq i, j\}\} = \{\{P_{[s,t,k]}(Y)|k \neq s, t\}\}$ .

This implies that there exists some permutation  $\sigma \in S_n$  such that  $\sigma(i) = s, \sigma(j) = t$  and  $P_{[i,j,k]}(X) = P_{[s,t,\sigma(k)]}(Y)$  for all  $k \neq i, j$ . We deduce that for all  $k \neq i, j$

$$\langle y_s, Tx_k \rangle = \langle Tx_i, Tx_k \rangle = \langle x_i, x_k \rangle = \langle y_s, y_{\sigma(k)} \rangle$$

and similarly

$$\begin{aligned} \langle y_t, Tx_k \rangle &= \langle y_t, y_{\sigma(k)} \rangle \\ \langle y_s \times y_t, Tx_k \rangle &= \langle y_s \times y_t, y_{\sigma(k)} \rangle \end{aligned}$$

Now note that each  $y_k$  is in the span of  $y_s, y_t, y_s \times y_t$  (even when  $r < 3$ ), and similarly every  $x_k$  is in the span of  $x_i, x_j, x_i \times x_j$  and so  $Tx_k$  is also in the span of  $y_s, y_t, y_s \times y_t$ . It follows that  $Tx_k - y_{\sigma(k)} = 0$ , and thus we showed that  $X$  and  $Y$  are related by a  $\mathcal{SO}[3, n]$  transformation.  $\square$

579

*Remark A.3.* In the proof above we said that if (18) holds, and  $y_s \times y_t$  is not zero, then  $T$  is in  $SO(3)$ . This follows from the fact that for general orthogonal transformations and vectors  $a, b$

$$(Ta) \times (Tb) = \det(T)T(a \times b).$$

Setting  $a = x_i, b = x_j$  and using (18) we obtain that

$$y_s \times y_t = \det(T)(y_s \times y_t)$$

and so if  $y_s \times y_t$  is not zero, then  $\det(T) = 1$ .

**Theorem 4.2.** Let  $F_\phi$  denote the parametric function simulating the 2-SEWL test. Then for Lebesgue almost every  $\phi$  the function  $F_\phi : \mathbb{R}^{3 \times n} \rightarrow \mathbb{R}^{6n+1}$  is separating with respect to the action of  $\mathcal{SO}[3, n]$ .

583 *Proof.* We recall that  $F_\phi$  is defined to simulate a single iteration of the 2-SEWL test using sort-based  
 584 injective multiset functions. In more detail, recall that the initial coloring corresponding to an index  
 585 pair  $(i, j)$  and a point cloud  $X \in \mathbb{R}^{3 \times n}$  is given by the Gram matrix of  $x_i, x_j$ , and denoted by  
 586  $\mathbf{C}_{(0)}(i, j) = \mathbf{C}_{(0)}(i, j)(X)$ . We then define

$$\mathbf{C}_{(1)}(i, j) = (\mathbf{C}_{(0)}(i, j), \mathbf{Embed}_\alpha ([\mathbf{C}_{(0)}(k, j), \mathbf{C}_{(0)}(i, k), \langle x_i \times x_j, x_k \rangle]_{k=1}^n)).$$

and

$$\mathbf{C}_G = \mathbf{Embed}_\beta (\mathbf{C}_{(1)}(i, j) | (i, j) \in [n]^2)$$

587 where  $\mathbf{Embed}_\theta(y_1, \dots, y_n)$  is permutation invariant (=multiset function), continuous in  $\theta$  and  $y_i$ ,  
 588 and defined by

$$\mathbf{Embed}_\theta(y_1, \dots, y_n) = \langle b_j, \Psi(a_j^T y_1 \dots, a_j^T y_n) \rangle, j = 1, \dots, 6n + 1. \quad (19)$$

589 with  $\Psi = \text{sort}$  (or alternatively,  $\Psi$  could be the power sum polynomials), and  $\theta$  denoting the  
 590 concatenation of all the mapping parameters  $a_i$  and  $b_j$ .

591 We denote by  $\phi = (\alpha, \beta)$  the concatenation of the two parameter vectors of the **Embed** mappings in  
 592 the constructions, and  $F_\phi(X)$  denoted the output  $C_G = C_G(X; \phi)$  obtained by this construction.

Since we already showed that the 2-SEWL test is complete, it is sufficient to show that for Lebesgue  
 almost every  $(\alpha, \beta)$ , the mapping  $\mathbf{Embed}_\alpha$  is permutation invariant and separating on  $\mathbb{R}^{3 \times n}$ , and the  
 mapping  $\mathbf{Embed}_\beta$  is permutation invariant and separating on the image of the mapping  $f_\alpha$  which we  
 define as

$$f_\alpha(X) = (\mathbf{C}_{(1)}(i, j)(X; \alpha) | (i, j) \in [n]^2).$$

By Theorem 4.1 we know that  $\mathbf{Embed}_\alpha$  is separating for Lebesgue almost every  $\alpha$ . For fixed  $\alpha$ , we  
 know that  $f_\alpha$  is a semi-algebraic mapping, since it is a composition of polynomials and the piecewise  
 linear sort function, which are semi-algebraic mappings, and as compositions of semi-algebraic  
 mappings are semi-algebraic mappings. The dimension of the image of a semi-algebraic mapping is  
 never larger than the dimension of the domain, and so  $f_\alpha(\mathbb{R}^{3 \times n})$  is a semi-algebraic set of dimension  
 $\leq \dim(\mathbb{R}^{3 \times n}) = 3n$  (see Basu et al. [2006b] for the necessary real algebraic geometry statements re  
 composition and dimension). To apply Theorem 3.2 we need to work with a permutation invariant  
 domain, so we artificially enlarge the domain of  $\mathbf{Embed}_\beta$  to be

$$\bigcup_{\sigma \in S_{n^2}} \sigma(f_\alpha(\mathbb{R}^{3 \times n}))$$

593 which is a finite union of sets of dimension  $\leq 3n$  and hence also has dimension  $\leq 3n$ . It follows  
 594 that for almost every  $\beta$  the function  $\mathbf{Embed}_\beta$  is separating on this permutation invariant set, with  
 595 embedding dimension of  $6n + 1$  as we defined in (19). Using Fubini's theorem, this implies that  
 596 for almost every  $(\alpha, \beta)$  the functions  $\mathbf{Embed}_\alpha$  and  $\mathbf{Embed}_\beta$  are both separating, and this proves the  
 597 theorem.  $\square$

598 **Complexity** We conclude by discussing the complexity of computing  $F_\phi$ . Calculating each  
 599  $\mathbf{C}_{(1)}(i, j)$  using sort-based embeddings  $\mathbf{Embed}_\alpha$  requires  $\mathcal{O}(n^2 \log(n))$  operations.

600 Since there are  $\mathcal{O}(n^2)$  such  $\mathbf{C}_{(1)}(i, j)$  the total complexity of computing all of them is  $\mathcal{O}(n^4 \log(n))$ .  
 601 In the second step we compute  $\mathbf{Embed}_\beta$  on multisets of size  $D \times N$  where  $D = \mathcal{O}(n)$ ,  $N = \mathcal{O}(n^2)$ ,  
 602 and with embedding dimension of  $\mathcal{O}(n)$ . This requires  $\mathcal{O}(n^4 + n^3 \log(n))$  operations, so the total  
 603 complexity is  $\mathcal{O}(n^4 \log(n))$

604 In Appendix D we extend our results to arbitrary  $d$ . In this case, we get a complexity of  
 605  $\mathcal{O}(n^{d+1} \log(n))$  (where for simplicity we consider the limit  $n \rightarrow \infty$  with  $d$  fixed, to cancel out some  
 606 mixed terms in  $n, d$  which are negligible in this limit. ).

## 607 B Experiment Details

608 As mentioned, we exemplified the viability of the theory presented by testing separation on challeng-  
 609 ing point cloud pairs. We wished to address the following scenario: given a pair of point clouds, each  
 610 labeled distinctly, what would be the accuracy score of  $\mathcal{SO}[3, n]$  (or  $\mathcal{O}[3, n]$ ) invariant architectures  
 611 in this classification task following training on a labeled dataset of these examples? This setup

partly informs us of the *separation* capability of these architectures, i.e. how well do these models distinguish similar ( for instance, 1-EWL equivalent ), yet non-isomorphic, input?

For implementation, we used code by Joshi et al. [2022] that implements several contemporary  $\mathcal{SO}[3, n]$  invariant architectures and evaluated them as described below. This framework has several additional tests for geometric graphs, but they were irrelevant to our setting because they are redundant for the fully-connected geometric graphs we focus on. We modified the implementation of Joshi et al. [2022] by implementing our novel invariant architectures, 2-SEWLnet, implementing EGNN Victor Garcia Satorras [2021], and testing counterexample point cloud pairs from Pozdnyakov et al. [2020], Pozdnyakov and Ceriotti [2022]. We used implementation by Joshi et al. [2022] of MACE Batatia et al. [2022], TFN Thomas et al. [2018] and GVPGNN Jing et al. [2021]. The  $\mathcal{SO}[3, n]$  invariant architectures are trained on replicas of each counterexample pair and then testing is performed on the same pair.

## B.1 Technical Details

| Hyperparameters  | 2-SEWLnet     | EGNN   | MACE   | TFN    | GVPGNN |
|------------------|---------------|--------|--------|--------|--------|
| Learning rate    | 0.0001        | 0.0001 | 0.0001 | 0.0001 | 0.0001 |
| Hidden Dimension | 2 (Pair-wise) | 1      | 2      | 64     | 64     |
| Number of Layers | 1             | 2      | 3      | 3      | 3      |
| Batch size       | 1             | 1      | 1      | 1      | 1      |
| Correlation      | NA            | NA     | 3      | 3      | NA     |

Table 2: GNN implementations and code pipeline based on Joshi et al. [2022].

We trained the various invariant models on an NVIDIA A40 GPU implemented in PyTorch Paszke et al. [2019]. The hyperparameters were a learning rate of 0.0001 with Adam optimizer Kingma and Ba [2017], with the learning rate scheduler ReduceOnPLateau that reduces the learning rate once the loss stopped diminishing. We trained each model on a dataset of 50 copies of each pair for 100 epochs, while injecting permutation and rotation to each point cloud during training. The test and validation datasets are each a pair of plain (no permutation or rotation injected) point clouds. Thus each epoch has ternary accuracy results, of 0%, 50%, and 100%. We then average the accuracy of the last 20% of epochs to obtain the overall accuracy. This was done to allow the model to converge while allowing for a sufficiently large test measurements to obtain statistical significance.

## B.2 2-SEWLnet

2-SEWLnet is an implementation of a simulation of a single iteration of 2-SEWL, see 4. We implemented the architecture by directly embedding the multiset function  $F_\phi$ , using the low-dimensional invariant embeddings from Section 4. We chose the sort function as the one-dimensional permutation separating invariant, as it constitutes an isometry from  $\mathbb{R}^n/S_n$  to  $\mathbb{R}^n$ , then composing it with linear mappings, yields a Bi-Lipschitz mapping Balan et al. [2022], Dym and Gortler [2023]. We used differentiable sorting from PyTorch Paszke et al. [2019] to enable backpropagation. We note that the model is able to learn the classification task with backpropagation only using the sort vector-wise activation, i.e. without a fully-connected neural network composed on it. This is not a trivial result that is immediately implied by the completeness of 2-SEWL, as we aim to minimize the softmax cross-entropy loss and in practice reach almost zero loss, thus not only yielding two distinct embeddings corresponding to each distinct point cloud ( as guaranteed by Theorem 3.2 ) but learning them to be (approximately) one-hot encoded vectors using our injective continuous **Embed** functions.

## B.3 EGNN

We used the EGNN version used for classification problems as described in Victor Garcia Satorras [2021], which does not use an equivariant coordinate update step. This version’s expressive power is bounded by 1-EWL. Interestingly, we found that using the original implementation did not yield sufficient separation for the classification task for the examples Hard1-3 in Table 1, yet when using sort and non-linear point-wise activations, rather than sums of neural network functions applied point-wise, led to perfect classification. The results in the table are reported with this implementation.

## C Background Theory

### C.1 Low Dimensional Separating Invariants

In Section 4 We presented a condensed summary of the results from Dym and Gortler [2023] as they pertain to this paper’s scope. We devote this appendix to expound on the context of these results. In Subsection 4.1, we discussed the *Power-Sum Symmetric Polynomials*. These polynomials yield a separating invariant with respect to permutations of real-valued vectors in  $\mathbb{R}^n$ . The invariant learning literature often discussed an extension of this characterization for vector-valued features, the *Multi-Power-Sum Symmetric Polynomials*, defined, for an input  $X = (x_1 \dots x_n) \in \mathbb{R}^{d \times n}$  and  $\alpha = (\alpha_1, \dots, \alpha_d) \in \mathbb{N}_{\geq 0}^d$ , as

$$P_\alpha(X) = \sum_{i=1}^n x_i^\alpha \quad (20)$$

$$P(X) = (P_\alpha(X))_{\alpha \in [n]^d, |\alpha| \leq n} \quad (21)$$

where  $x^\alpha := x_1^{\alpha_1} \dots x_d^{\alpha_d}$  and  $|\alpha| := \sum_{i=1}^n \alpha_i$ . These polynomials define a separating invariant for point clouds in  $\mathbb{R}^d$  with respect to the permutation of the (n) columns Maron et al. [2019b]. Yet, its embedding dimension is  $\binom{n+d}{d}$ . The goal of Dym and Gortler [2023] was to reduce the embedding dimension to a complexity linear in the  $n \cdot d$  dimension of the input.

As a first example of such a result, Dym and Gortler [2023] show the for Lebesgue almost every  $\binom{n+d}{d}$  dimensional vectors  $w_1, \dots, w_{2nd+1}$

$$X \underset{S_n}{=} Y \iff \langle w_i, P(X) \rangle = \langle w_i, P(Y) \rangle, i = 1, \dots, 2 \dim(\mathcal{M}) + 1 \quad (22)$$

Thus we obtain a separating invariant of dimension  $O(d \cdot n)$  rather than  $O(n^{2d})$ . Yet, we still had to calculate all of the  $O(n^{2d})$  polynomial entries. Therefore, computationally speaking, this approach did not yield much.

To remedy this, Dym and Gortler [2023] proposed alternative invariants based on  $\mathbb{R}^n$  permutation invariants  $\Psi$ . Such a  $\Psi$ , and any choice of a vector  $a \in \mathbb{R}^d$ , induces a permutation invariant on  $\mathbb{R}^{d \times n}$  of the form

$$\mathbb{R}^{d \times n} \ni (x_1, \dots, x_n) \mapsto \Psi(a^T x_1, \dots, a^T x_n).$$

This technique of producing high dimensional invariants from low dimensional ones is known as *polarization*. To obtain invariants that are also *separating*, we need (i) to choose  $\Psi$  to be invariant and separating on  $\mathbb{R}^n$ . Two examples of such functions, are the functions  $\Psi_{\text{sort}}$  and  $\Psi_{\text{pow}}$  which we defined in (5):

$$\Psi_{\text{sort}}(x_1, \dots, x_n) = \text{sort}(x_1, \dots, x_n) \quad \text{and} \quad \Psi_{\text{pow}}(x_1, \dots, x_n) = \left( \sum_{i=1}^n x_i^t \right)_{t=1}^n.$$

Additionally, we need (ii) to choose not a single polarization function defined by a single  $a$ , but rather  $2nd + 1$  random vectors  $a_1, \dots, a_{2nd+1}$ . More precisely, Dym and Gortler [2023] showed that for Lebesgue almost every  $a_1, \dots, a_{2nd+1} \in \mathbb{R}^d$  and  $b_1, \dots, b_{2nd+1} \in \mathbb{R}^n$  the function

$$\text{Embed}_\theta(x_1, \dots, x_n) = \langle b_j, \Psi(a_j^T x_1 \dots, a_j^T x_n) \rangle, j = 1, \dots, 2nd + 1. \quad (23)$$

defined in (6) is permutation invariant and separating. The role of the projection by the  $b_j$  is to reduce the embedding dimension to  $2nd + 1$  rather than the  $(2nd + 1)n$  dimension we would get if these projections were not applied.

We note that the complexity of a single invariant in (23) would be  $O(n \log(n))$  (assuming  $n > d$ ) when using sorting or  $O(n^2)$  when using power sum polynomials. Accordingly, the complexity of computing  $2nd + 1$  invariants would be  $O(dn^2 \log(n))$  using sorting or  $O(dn^3)$  using power sum polynomials.

Finally, we note that (as mentioned in the main text), if we’re interested in separation only on a semi-algebraic permutation invariant subset  $\mathcal{X} \subseteq \mathbb{R}^{d \times n}$  with dimension  $D_{\mathcal{X}}$ , then the number of separating invariants needed in (23) would be  $2D_{\mathcal{X}} + 1$  rather than  $2nd + 1$ .

## D Extensions

In the main text we described Vanilla  $k$ -WL tests which are well-defined for all  $k$  and  $d$ , and the 2-SEWL test which is well-defined for the case  $d = 3$  (since vector products are used). We now explain how to define a  $(d - 1)$  SEWL test for general  $d$ , and then explain how these tests can be easily modified to give a  $(d - 1)$ -EWL test with similar complexity, which is  $\mathcal{O}[3, n]$  invariant and separating rather than  $\mathcal{SO}[3, n]$  invariant and separating.

### D.1 SEWL for General Dimension $d$

The complete 2-SEWL test for  $d = 3$  point clouds can be generalized to a  $(d - 1)$ -SEWL test for general  $d$ -dimensional point clouds by a generalization of the cross-product operator. This generalization is formally known as the Hodge dual operator Jost [2017].

For fixed  $x_{i_1}, \dots, x_{i_{d-1}} \in \mathbb{R}^d$ , we define the following linear functional

$$f : \mathbb{R}^d \rightarrow \mathbb{R}$$

$$f(x) = \det(x, x_{i_1}, \dots, x_{i_{d-1}})$$

By Riesz's Representation Theorem Bachman and Narici [2000], every linear functional on  $\mathbb{R}^d$  is essentially a function in the form of a dot product against some (unique) vector in  $\mathbb{R}^d$ . Thus, there exists some vector, denoted by  $x^* = x^*(x_{i_1}, \dots, x_{i_{d-1}}) \in \mathbb{R}^d$ , such that

$$\det(x, x_{i_1}, \dots, x_{i_{d-1}}) = f(x) = \langle x, x^* \rangle. \quad (24)$$

We see directly from the definition that  $x^*$  is orthogonal to  $x_{i_1}, \dots, x_{i_{d-1}}$  and is non-zero if and only if these  $d - 1$  vectors are linearly independent. Moreover, this choice of vector is  $SO(d)$  equivariant, which means that for any  $x_{i_1}, \dots, x_{i_{d-1}} \in \mathbb{R}^d$  and  $R \in SO(d)$  we have

$$x^*(Rx_{i_1}, \dots, Rx_{i_{d-1}}) = Rx^*(x_{i_1}, \dots, x_{i_{d-1}}). \quad (25)$$

This is because for any  $x \in \mathbb{R}^d$  we have

$$\begin{aligned} \det(x, Rx_{i_1}, \dots, Rx_{i_{d-1}}) &= \det(RR^T x, Rx_{i_1}, \dots, Rx_{i_{d-1}}) \\ &= \det(R) \det(R^T x, x_{i_1}, \dots, x_{i_{d-1}}) \\ &= \langle R^T x, x^* \rangle \\ &= \langle x, Rx^* \rangle \end{aligned}$$

Finally, we note that the coordinates of  $x^*$  can be calculated by inserting the unit vectors  $e_1, \dots, e_d$  into (24). That is

$$(x^*)_j = \det(e_j, x_{i_1}, \dots, x_{i_{d-1}})$$

where  $(x^*)_j$  is the  $j$ -th entry of  $x^*$ . This requires computing  $d$  different determinants of  $d \times d$  matrices, and so the total complexity of computing  $x^*$  is  $d^4$ .

**The  $(d - 1)$ -SEWL test** We have shown an extension of the definition of the cross-product that respects orientation, thus now we can naturally define a  $(d - 1)$ -SEWL test which will be  $\mathcal{SO}[d, n]$  invariant and separating in  $d$  dimensions (generalizing the 2-SEWL test for  $d = 3$ ).

We define for each  $(d - 1)$ -tuple  $\mathbf{i} \in [n]^{d-1}$  an initial coloring  $\mathbf{C}_{(0)}(\mathbf{i}) = \mathbf{C}_{(0)}(\mathbf{i})(X)$  corresponding to the  $(d - 1) \times (d - 1)$  Gram matrix of the points  $x_{i_1}, \dots, x_{i_{d-1}}$ . We denote  $x^*(x_{i_1}, \dots, x_{i_{d-1}})$  by  $x^*(\mathbf{i})$ . The coloring is then refined via

$$\mathbf{C}_{(1)}(\mathbf{i}) = \mathbf{Embed}^{(0)}(\mathbf{C}_{(0)}(\mathbf{i}), \{\{\mathbf{C}_{(0)}(\mathbf{i}[k \setminus 1]), \dots, \mathbf{C}_{(0)}(\mathbf{i}[k \setminus (d - 1)]\}, \langle x^*(\mathbf{i}), x_k \rangle\}_{k=1}^n).$$

where  $\mathbf{i}[j \setminus t]$  is the multi-index  $\mathbf{i}$  with its  $t$ -th coordinate replaced by  $j$ ; e.g. for  $t = 1$ ,  $\mathbf{i}[j \setminus 1] = (j, i_2, \dots, i_k)$ . Then a final global coloring is obtained from

$$\mathbf{C}_{\mathcal{G}} = \mathbf{Embed}^{(1)}(\{\{\mathbf{C}_{(1)}(\mathbf{i}) \mid \mathbf{i} \in [n]^{d-1}\}\})$$

The  $(d - 1)$ -SEWL test can be shown to be  $\mathcal{SO}[d, n]$  complete, using the same arguments used in the proof of Theorem 3.2.

## 716 D.2 $(d - 1)$ -EWL for general dimension $d$

717 We now return to the case where reflections are also considered symmetries, and we're looking for  
 718 complete tests with respect to the group  $\mathcal{O}[d, n]$ . The Vanilla- $d$ -WL test will be  $\mathcal{O}[d, n]$  complete.  
 719 However, a more efficient test can be obtained by tweaking the  $(d - 1)$ -SEWL test which is not  
 720 reflection-invariant, to attain a reflection invariant  $\mathcal{O}[d, n]$  complete test.

721 This tweaking is obtained as follows. We fix some reflection  $R_0$  (a reflection is an orthogonal matrix  
 722 with a negative determinant). We define the  $(d - 1)$ -EWL test for a given  $X \in \mathbb{R}^{d \times n}$  by applying the  
 723  $(d - 1)$ -SEWL test to both  $X$  and  $R_0 X$  to obtain  $\mathbf{C}_G(X)$  and  $\mathbf{C}_G(R_0 X)$ , and then computing a final  
 724 global feature via

$$C_G^{ref}(X) = \mathbf{Embed}^{(2)} \{ \mathbf{C}_G(X), \mathbf{C}_G(R_0 X) \} \quad (26)$$

725 In the following theorem, we show how the completeness of the  $(d - 1)$ -SEWL test implies the  
 726 completeness of the  $(d - 1)$ -EWL test.

727 **Theorem D.1.** *For every  $X, Y \in \mathbb{R}^{d \times n}$ , a single iteration of the  $(d - 1)$ -EWL test assigns  $X$  and  $Y$*   
 728 *the same value if and only if  $X \stackrel{\mathcal{O}[d, n]}{=} Y$ .*

729 *Proof. Invariance:* We prove that for every  $R \in O(d)$  and permutation matrix  $P \in S_n$  we have  
 730 that  $C_G^{ref}(RXP) = C_G^{ref}(X)$ . We can divide into two cases: If  $R \in SO(d)$  then by the  $\mathcal{SO}[d, n]$   
 731 invariance of  $\mathbf{C}_G(X)$  we have that

$$\begin{aligned} \mathbf{C}_G(RXP) &= \mathbf{C}_G(X) \\ \mathbf{C}_G(R_0 RXP) &= \mathbf{C}_G((R_0 R R_0^T) R_0 X P) = \mathbf{C}_G(R_0 X) \end{aligned}$$

732 On the other hand, if  $R$  is a reflection, then

$$\begin{aligned} \mathbf{C}_G(RXP) &= \mathbf{C}_G((R R_0^T) R_0 X P) = \mathbf{C}_G(R_0 X) \\ \mathbf{C}_G(R_0 RXP) &= \mathbf{C}_G(X) \end{aligned}$$

and so in both cases, we obtain that

$$C_G^{ref}(RXP) = \mathbf{Embed}^{(2)} \{ \mathbf{C}_G(RXP), \mathbf{C}_G(R_0 RXP) \} = \mathbf{Embed}^{(2)} \{ \mathbf{C}_G(X), \mathbf{C}_G(R_0 X) \} = C_G^{ref}(X)$$

733 **Completeness:** We prove that if  $X, Y \in \mathbb{R}^{d \times n}$  and  $C_G^{ref}(X) = C_G^{ref}(Y)$  then  $X$  and  $Y$  are related  
 734 by a permutation and orthogonal transformation.

735 Since  $C_G^{ref}(X) = C_G^{ref}(Y)$  it follows that either  $\mathbf{C}_G(X) = \mathbf{C}_G(Y)$  or  $\mathbf{C}_G(X) = \mathbf{C}_G(R_0 Y)$ . The  
 736 completeness of the  $(d - 1)$ -SEWL test (Theorem 3.2) then implies that  $X$  is related to either  $Y$   
 737 or  $R_0 Y$  by an  $\mathcal{SO}[d, n]$  transformation. In either case, this implies that  $X$  and  $Y$  are related by an  
 738  $\mathcal{O}[d, n]$  transformation.  $\square$

## 739 D.3 Continuous Implementation and Computational Complexity

740 In Section 4 we showed how the 2-SEWL test can be realized by a continuous piecewise differentiable  
 741 architecture that uses sort-based multi-set injective functions. The complexity of this construction  
 742 was  $O(n^4 \log(n))$ . Similarly, the  $(d - 1)$ -SEWL and  $(d - 1)$ -EWL tests can be computed with  
 743 complexity of  $O(n^{d+1} \log(n))$  (in the scenario where  $d$  stays constant and  $n \rightarrow \infty$ ). The leading  
 744 order of the computation complexity stems from computing the  $n^{d-1}$  colorings  $(\mathbf{C}_{(1)}(\mathbf{i}), \mathbf{i} \in [n]^{d-1})$   
 745 and embedding their corresponding multisets, each one of those requires  $\mathcal{O}(n^2 \log(n))$  operations.
